# Supplementary material
Source: MDPI journal article supplement (https://www.mdpi.com/2077-0472/13/1/8)
Supplement: s1 [file s1]

**Table S1** Importance of optimal bands and spectral indices for SOM estimation using single-temporal images.

| Year | Date  | Single band | Spectral indices                                                                      |                                                                                               |
|------|-------|-------------|---------------------------------------------------------------------------------------|-----------------------------------------------------------------------------------------------|
| 2016 | 10-20 | Variables   | B <sub>7</sub> , B <sub>8</sub> , B <sub>11</sub> , B <sub>4</sub> , B <sub>12</sub>  | D <sub>412</sub> , D <sub>84</sub> , D <sub>128</sub> , D <sub>47</sub> , ND <sub>118</sub>   |
|      |       | Importance  | 336.71, 328.24, 96.50, 74.17, 61.61                                                   | 455.53, 162.44, 67.58, 54.40, 312.46                                                          |
|      | 11-16 | Variables   | B <sub>11</sub> , B <sub>8a</sub> , B <sub>5</sub> , B <sub>12</sub> , B <sub>8</sub> | D <sub>125</sub> , D <sub>58a</sub> , D <sub>88a</sub> , D <sub>8a12</sub> , D <sub>58</sub>  |
|      |       | Importance  | 476.27, 297.36, 112.38, 107.95, 33.56                                                 | 551.24, 127.12, 68.86, 61.05, 27.94                                                           |
| 2018 | 10-17 | Variables   | B <sub>6</sub> , B <sub>7</sub> , B <sub>8</sub> , B <sub>8a</sub> , B <sub>11</sub>  | D <sub>611</sub> , D <sub>8a6</sub> , D <sub>68</sub> , D <sub>76</sub> , ND <sub>78a</sub>   |
|      |       | Importance  | 348.58, 348.15, 283.30, 245.17, 197.24                                                | 537.17, 31.56, 28.98, 28.56, 26.63                                                            |
|      | 11-16 | Variables   | B <sub>4</sub> , B <sub>12</sub> , B <sub>8a</sub> , B <sub>8</sub> , B <sub>7</sub>  | D <sub>124</sub> , D <sub>48</sub> , D <sub>78a</sub> , R <sub>87</sub> , ND <sub>78</sub>    |
|      |       | Importance  | 248.63, 155.23, 153.07, 150.11, 127.04                                                | 613.57, 160.87, 126.04, 123.01, 119.94                                                        |
| 2020 | 10-16 | Variables   | B <sub>7</sub> , B <sub>11</sub> , B <sub>5</sub> , B <sub>4</sub> , B <sub>12</sub>  | D <sub>124</sub> , D <sub>411</sub> , D <sub>74</sub> , D <sub>1112</sub> , ND <sub>411</sub> |
|      |       | Importance  | 386.12, 333.98, 233.06, 189.96, 119.91                                                | 558.52, 182.89, 146.22, 129.00, 121.43                                                        |
|      | 11-15 | Variables   | B <sub>8</sub> , B <sub>7</sub> , B <sub>8a</sub> , B <sub>4</sub> , B <sub>6</sub>   | D <sub>8a4</sub> , D <sub>84</sub> , D <sub>74</sub> , R <sub>86</sub> , ND <sub>86</sub>     |
|      |       | Importance  | 478.48, 285.98, 260.81, 227.11, 181.71                                                | 581.16, 119.15, 100.02, 99.94, 93.07                                                          |

**Table S2.** Statistical results of the three different modelling algorithms using single-temporal images based on full spectrum data and the optimum bands and spectral indices in 2016, 2018, and 2020.

| Modelling strategies | Year | Period | Full Spectrum |              |             |              |              | Optimum bands and spectral indices |              |             |              |              |
|----------------------|------|--------|---------------|--------------|-------------|--------------|--------------|------------------------------------|--------------|-------------|--------------|--------------|
|                      |      |        | Calibration   |              | Validation  |              |              | Calibration                        |              | Validation  |              |              |
|                      |      |        | $R^2_{cal}$   | $RMSE_{cal}$ | $R^2_{val}$ | $RMSE_{val}$ | $RPIQ_{val}$ | $R^2_{cal}$                        | $RMSE_{cal}$ | $R^2_{val}$ | $RMSE_{val}$ | $RPIQ_{val}$ |
| PLS                  | 2016 | 10-20  | 0.38          | 3.59         | 0.32        | 3.16         | 2.18         | 0.47                               | 2.87         | 0.40        | 2.81         | 2.45         |
|                      |      | 11-16  | 0.43          | 3.13         | 0.37        | 3.00         | 2.30         | 0.54                               | 2.50         | 0.46        | 2.66         | 2.59         |
|                      | 2018 | 10-17  | 0.43          | 3.15         | 0.38        | 2.98         | 2.31         | 0.54                               | 2.52         | 0.46        | 2.66         | 2.59         |
|                      |      | 11-16  | 0.38          | 3.4          | 0.34        | 3.07         | 2.24         | 0.48                               | 2.72         | 0.43        | 2.73         | 2.52         |
|                      | 2020 | 10-16  | 0.39          | 3.31         | 0.36        | 3.02         | 2.28         | 0.49                               | 2.65         | 0.44        | 2.65         | 2.60         |
|                      |      | 11-15  | 0.42          | 3.19         | 0.38        | 3.00         | 2.30         | 0.53                               | 2.55         | 0.47        | 2.63         | 2.62         |
|                      | 2016 | 10-20  | 0.43          | 3.04         | 0.36        | 2.98         | 2.31         | 0.51                               | 2.58         | 0.45        | 2.65         | 2.60         |
|                      |      | 11-16  | 0.47          | 2.87         | 0.38        | 2.97         | 2.32         | 0.55                               | 2.44         | 0.47        | 2.64         | 2.61         |
|                      | 2018 | 10-17  | 0.51          | 2.55         | 0.45        | 2.70         | 2.55         | 0.60                               | 2.17         | 0.55        | 2.40         | 2.87         |
|                      |      | 11-16  | 0.44          | 2.98         | 0.38        | 2.96         | 2.33         | 0.52                               | 2.53         | 0.47        | 2.63         | 2.62         |
| GWR                  | 2020 | 10-16  | 0.45          | 2.93         | 0.40        | 2.88         | 2.39         | 0.53                               | 2.49         | 0.49        | 2.56         | 2.69         |
|                      |      | 11-15  | 0.49          | 2.62         | 0.43        | 2.84         | 2.43         | 0.5                                | 2.23         | 0.5         | 2.52         | 2.73         |

|    |      |       |      |      |      |      |      |          |      |          |      |      |
|----|------|-------|------|------|------|------|------|----------|------|----------|------|------|
| RF | 2016 | 10-20 | 0.44 | 2.8  | 0.40 | 2.83 | 2.44 | 0.5<br>3 | 2.52 | 0.5<br>0 | 2.67 | 2.58 |
|    |      | 11-16 | 0.52 | 2.46 | 0.44 | 2.68 | 2.57 | 0.5<br>8 | 2.21 | 0.5<br>4 | 2.53 | 2.72 |
|    | 2018 | 10-17 | 0.55 | 2.34 | 0.50 | 2.48 | 2.77 | 0.6<br>2 | 2.11 | 0.6<br>1 | 2.35 | 2.93 |
|    |      | 11-16 | 0.53 | 2.49 | 0.47 | 2.53 | 2.72 | 0.5<br>9 | 2.24 | 0.5<br>7 | 2.39 | 2.88 |
|    | 2020 | 10-16 | 0.49 | 2.73 | 0.43 | 2.69 | 2.56 | 0.5<br>4 | 2.46 | 0.5<br>3 | 2.54 | 2.71 |
|    |      | 11-15 | 0.54 | 2.38 | 0.48 | 2.51 | 2.74 | 0.6<br>0 | 2.14 | 0.5<br>8 | 2.37 | 2.91 |

**Table S3.** Analysis of variance in the  $RMSE_{val}$  values of double-temporal images and regression models based on the optimal bands and spectral indices.

| Source of Variation    | Sum of the squares | Degrees of freedom | Mean square | $F$ -value | $p$ -Value |
|------------------------|--------------------|--------------------|-------------|------------|------------|
| Double-temporal images | 0.097              | 2                  | 0.049       | 5.445      | 0.012      |
| Statistical models     | 0.052              | 2                  | 0.026       | 1.597      | 0.045      |

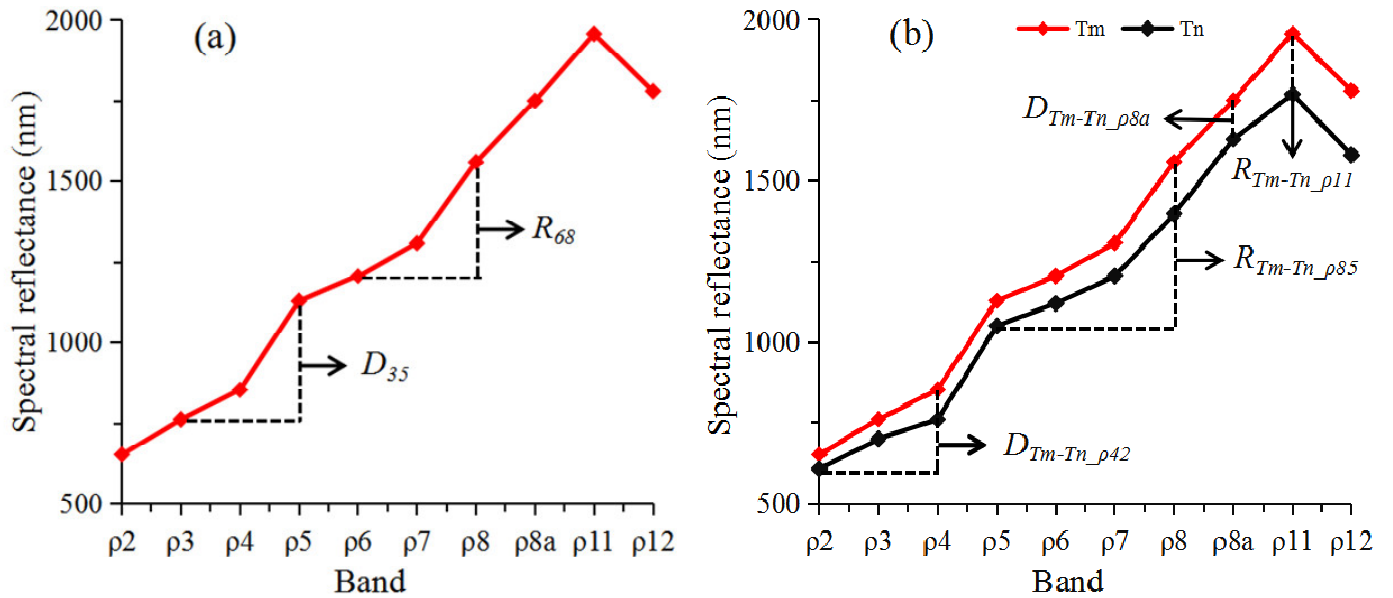

**Figure S1.** Illustration of the spectral indices constructed by (a) single-temporal images and (b) multitemporal images.

Notes: The spectral reflectance is the value after the original spectral reflectance is expanded by a factor of 10,000.  $D_{35}$  is the difference in spectral reflectance between band 3 and band 5.  $R_{68}$  is the spectral reflectance ratio between band 6 and band 8.  $T_m$  and  $T_n$  indicate the date of image acquisition.  $D_{T_m-T_n_{\rho 7}}$  is the difference of band 7 in different periods.  $D_{T_m-T_n_{\rho 42}}$  is the difference between band 4 of  $T_m$  and band 2 of  $T_n$ .  $R_{T_m-T_n_{\rho 11}}$  is the ratio of band 11 in different periods.  $R_{T_m-T_n_{\rho 85}}$  is the ratio of band 8 of  $T_m$  to band 5 of  $T_n$ .

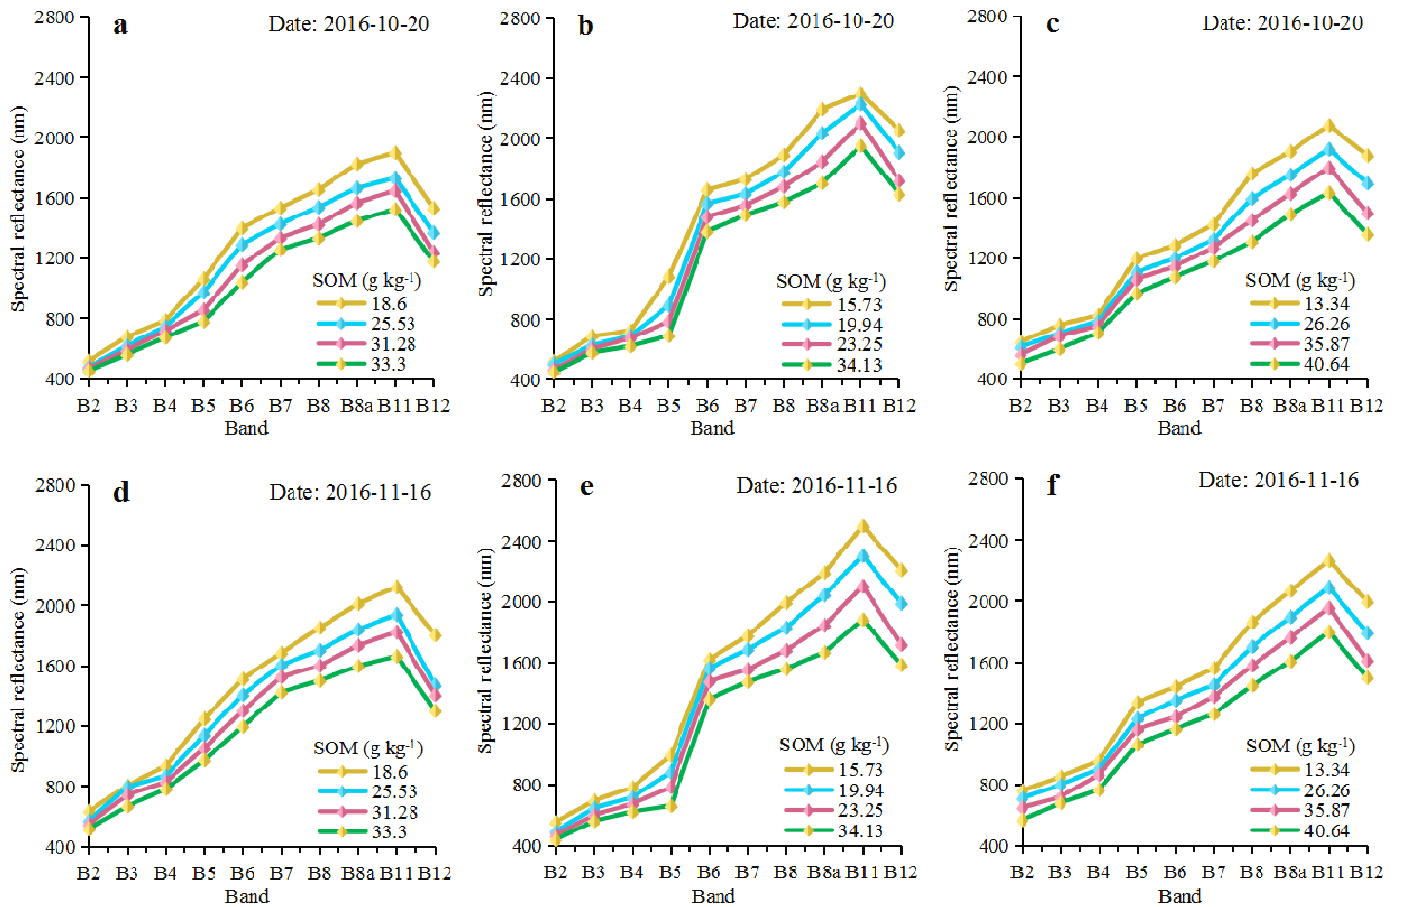

**Figure S2.** Spectral reflectance data for different soil types with different SOM contents in the same period in 2016: (a) and (d) fluvo-aquic soils; (b) and (e) yellow-brown earths; (c) and (f) paddy soils.

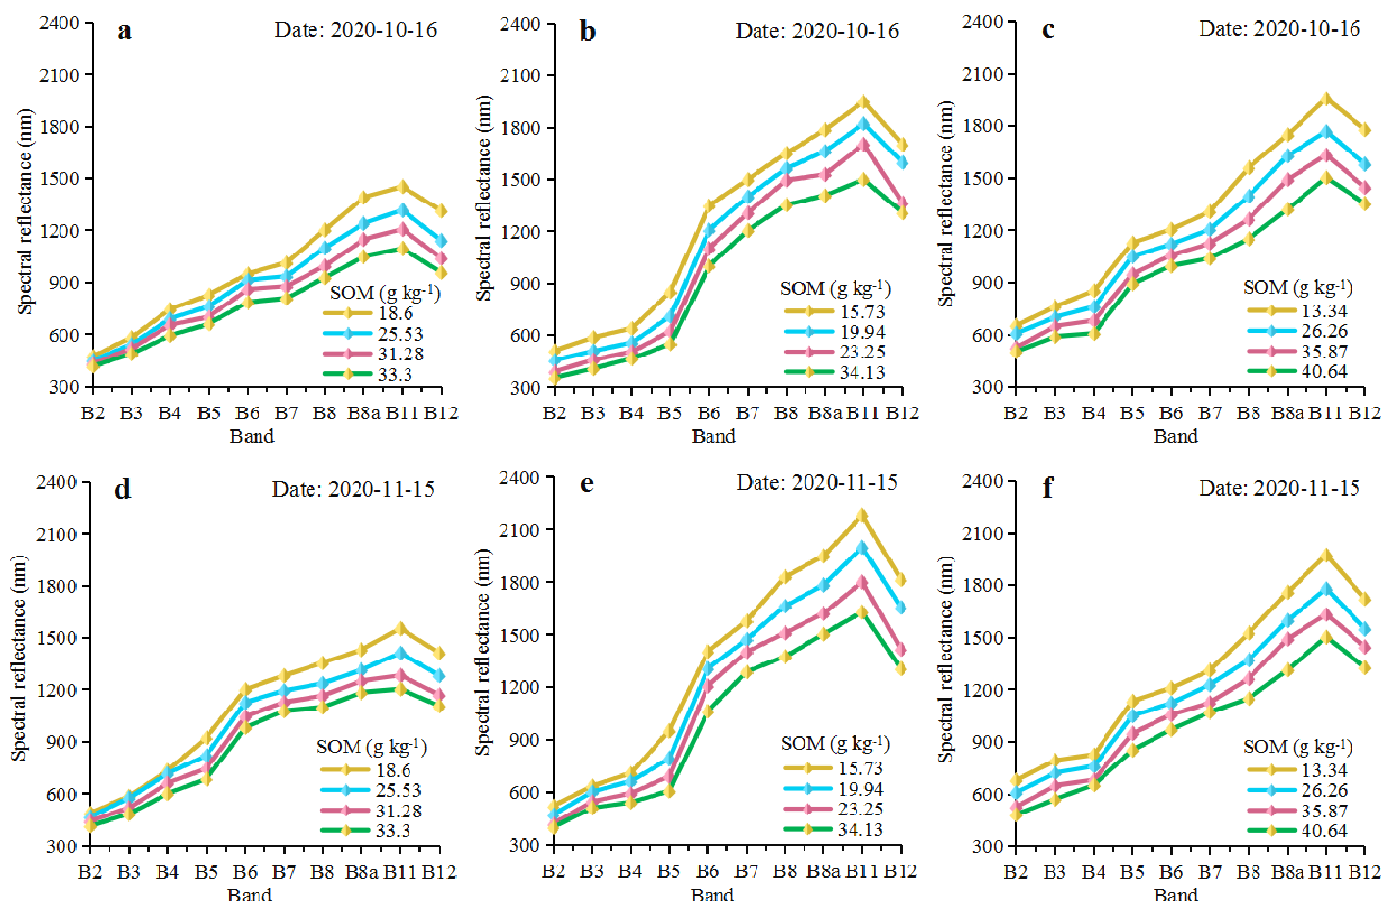

**Figure S3.** Spectral reflectance data for different soil types with different SOM contents in the same period in 2020: (a) and (d) fluvo-aquic soils; (b) and (e) yellow-brown earths; (c) and (f) paddy soils.

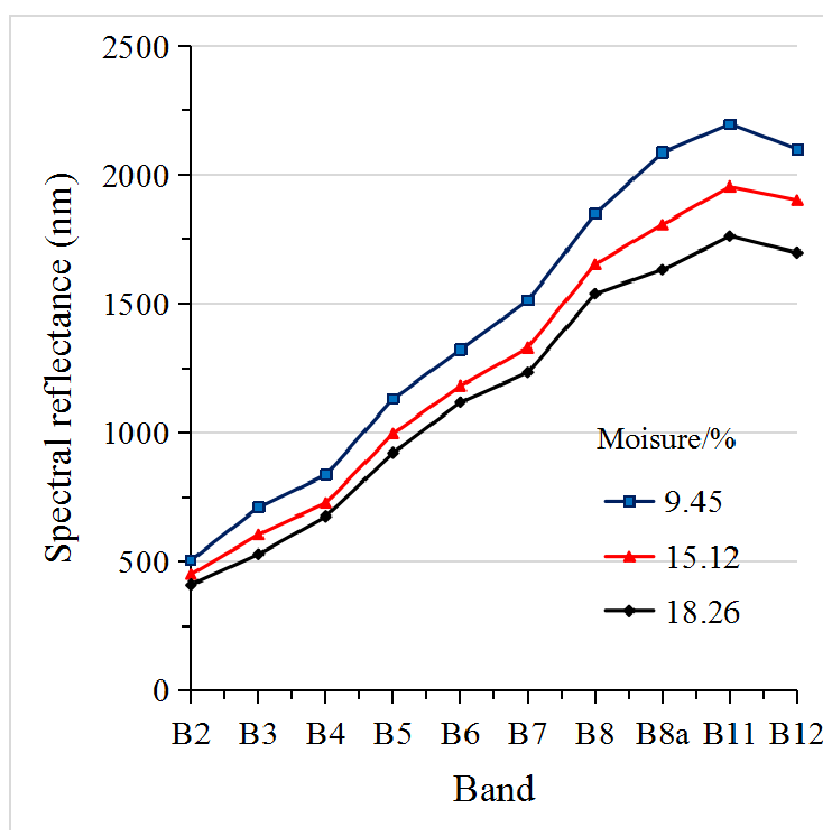

**Figure S4.** Soil spectral curves for the same SOM content at different moisture contents.

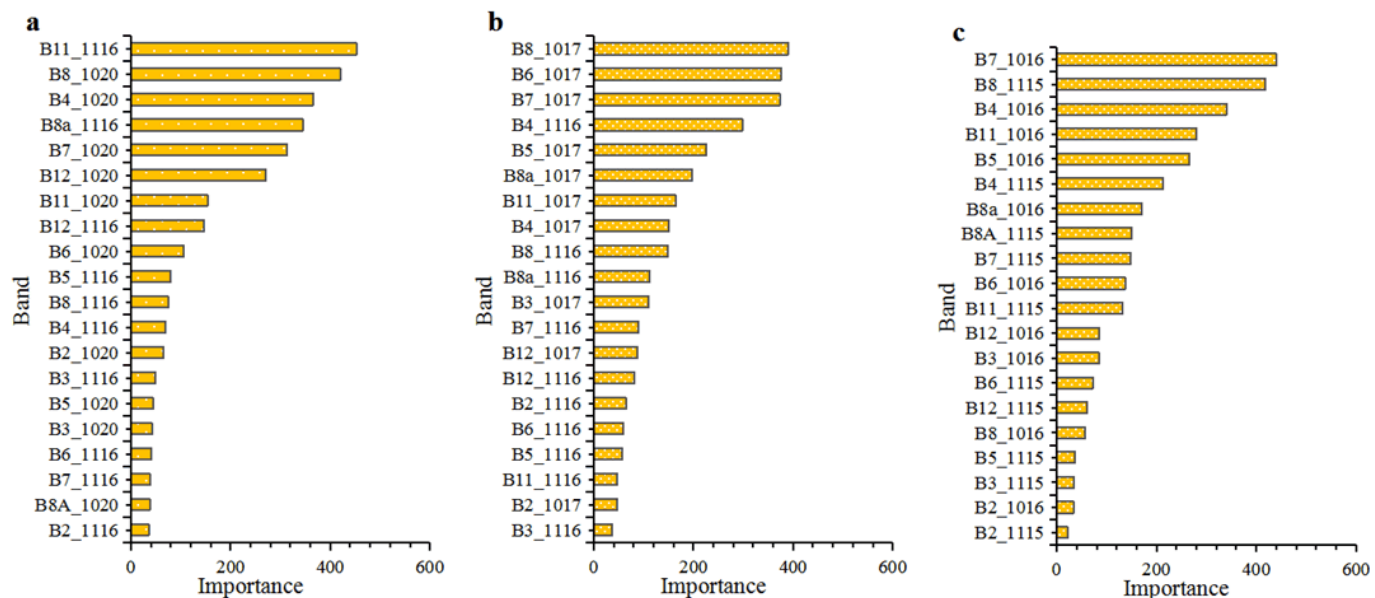

**Figure S5.** Importances of the bands in the SOM estimation model based on double-temporal images: (a) 2016; (b) 2018; (c) 2020.
